# Supplementary material for: VWF–ADAMTS13 axis dysfunction in children with sickle cell disease treated with hydroxycarbamide vs blood transfusion
Source: PubMed Central journal article supplement — Blood Adv. 2023 Oct 4;7(22):6974–89. doi: 10.1182/bloodadvances.2023010824 (PMC10690561; doi:10.1182/bloodadvances.2023010824), 2023-10-04

**VWF-ADAMTS13 axis dysfunction in children with sickle cell disease treated with hydroxycarbamide compared to blood transfusion – biological mechanisms and clinical significance.**

Helen Fogarty<sup>1, 2, 3</sup>, Azaz Ahmad<sup>1</sup>, Ferdows Atiq<sup>1</sup>, Dearbhla Doherty<sup>1</sup>, Soracha Ward<sup>1</sup>, Ellie Karampini<sup>1</sup>, Aisling Rehill<sup>1</sup>, Gemma Leon<sup>1</sup>, Rosena Geoghegan<sup>2</sup>, Helena Conroy<sup>2</sup>, Mary Byrne<sup>4</sup>, Ulrich Budde<sup>5</sup>, Sonja Schneppenheim<sup>5</sup>, Ciara Sheehan<sup>6</sup>, Noel Ngwenya<sup>6</sup>, Ross I. Baker,<sup>7, 8</sup> Roger J.S. Preston<sup>1, 3</sup>, Emma Tuohy<sup>6</sup>, Corrina McMahon<sup>2, 3</sup> and James S. O'Donnell<sup>1, 3, 4, 8</sup>

<sup>1</sup> Irish Centre for Vascular Biology, School of Pharmacy and Biomolecular Sciences, Royal College of Surgeons in Ireland, Dublin 2, Ireland.

<sup>2</sup> Department of Haematology, Children's Health Ireland (CHI) at Crumlin, Dublin, Ireland.

<sup>3</sup> National Children's Research Centre, Children's Health Ireland (CHI) at Crumlin, Dublin, Ireland.

<sup>4</sup> National Coagulation Centre, St James's Hospital, Dublin, Ireland

<sup>5</sup> Medilys Laborgesellschaft mbH, Department of Hämostaseology, Hamburg, Germany

<sup>6</sup> Department of Haematology, St James's Hospital, Dublin, Ireland

<sup>7</sup> Western Australia Centre for Thrombosis and Haemostasis, Perth Blood Institute, Murdoch University, Perth, WA, Australia.

<sup>8</sup> Irish-Australian Blood Collaborative (IABC) Network.

**SUPPLEMENTAL MATERIALS**

## Supplementary Legends

**Supplementary Figure 1:** Flow cytometry gating strategy for measuring phosphatidylserine exposure on red blood cells.

**Supplementary Figure 2:** Flow cytometry gating strategy for measuring recombinant VWF binding to red blood cells.

**Supplementary Figure 3:** HC children (n=96) were divided according to Hb F quartiles and levels of VWF:Ag **A)** and VWF:CB **B)** were compared. HbF quartile 1 is <12.1%, Quartile 2 is 12.1%-16.1%, Quartile 3 is 16.2%-20.8% and Quartile 4 is >20.8% BT treated children (n=84) were divided according to Hb S quartiles and levels of VWF:Ag **C)** and VWF:CB **D)** were compared. HbS quartile 1 is <14.1%, Quartile 2 is 14.1%-19.7%, Quartile 3 is 19.7%-27.4% and Quartile 4 is >27.4%. Comparison between first and fourth quartiles was performed with independent sample *t*-test. (\**p*<0.05).

**Supplementary Figure 4:** Comparisons between Group O and Non O ABO blood group are shown for plasma VWF:CB (n=119 Group O, n=76 Non O) **A)** and VWFpp (n=72 Group O, n=51 Non-O) **B)** levels.

**Supplementary Figure 5:** Association between plasma free haem and ADAMTS13 activity is shown **A)**. ADAMTS13 activity is shown according to free haem quartiles comparing the highest and lowest quartiles for the HC **B)** and BT **C)** cohorts. Comparison between first and fourth quartile was performed with independent sample *t*-test. (ns= not significant).

Supplementary Figure 1

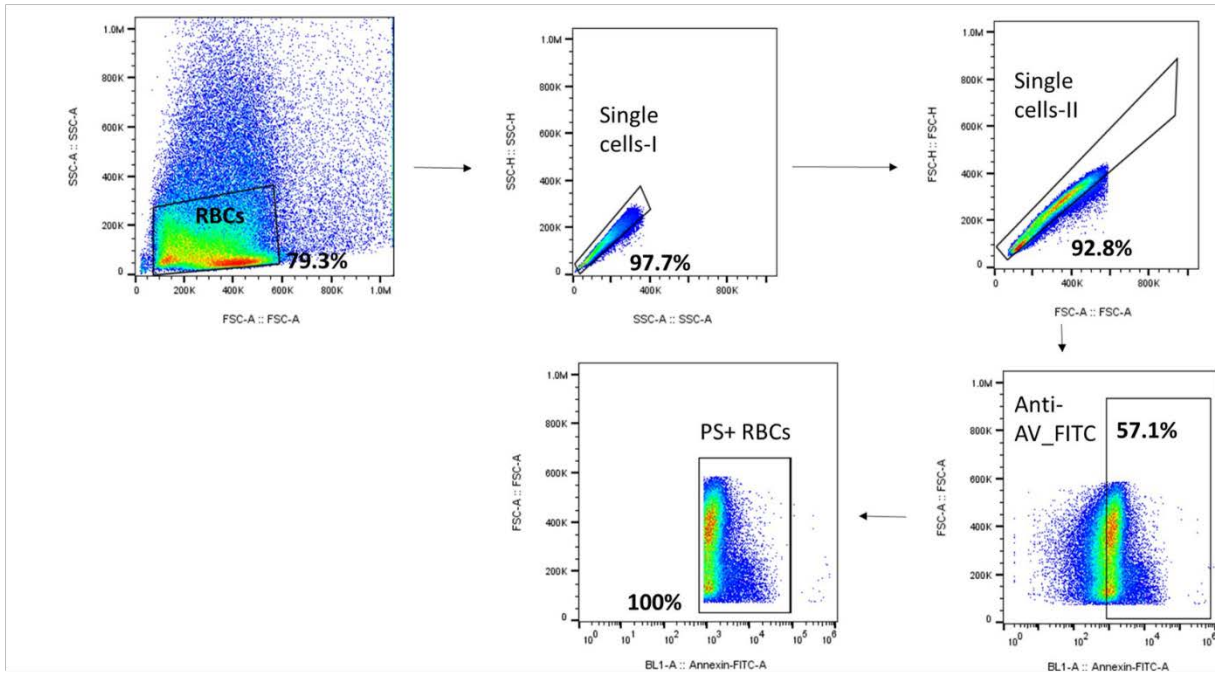

Supplementary Figure 2

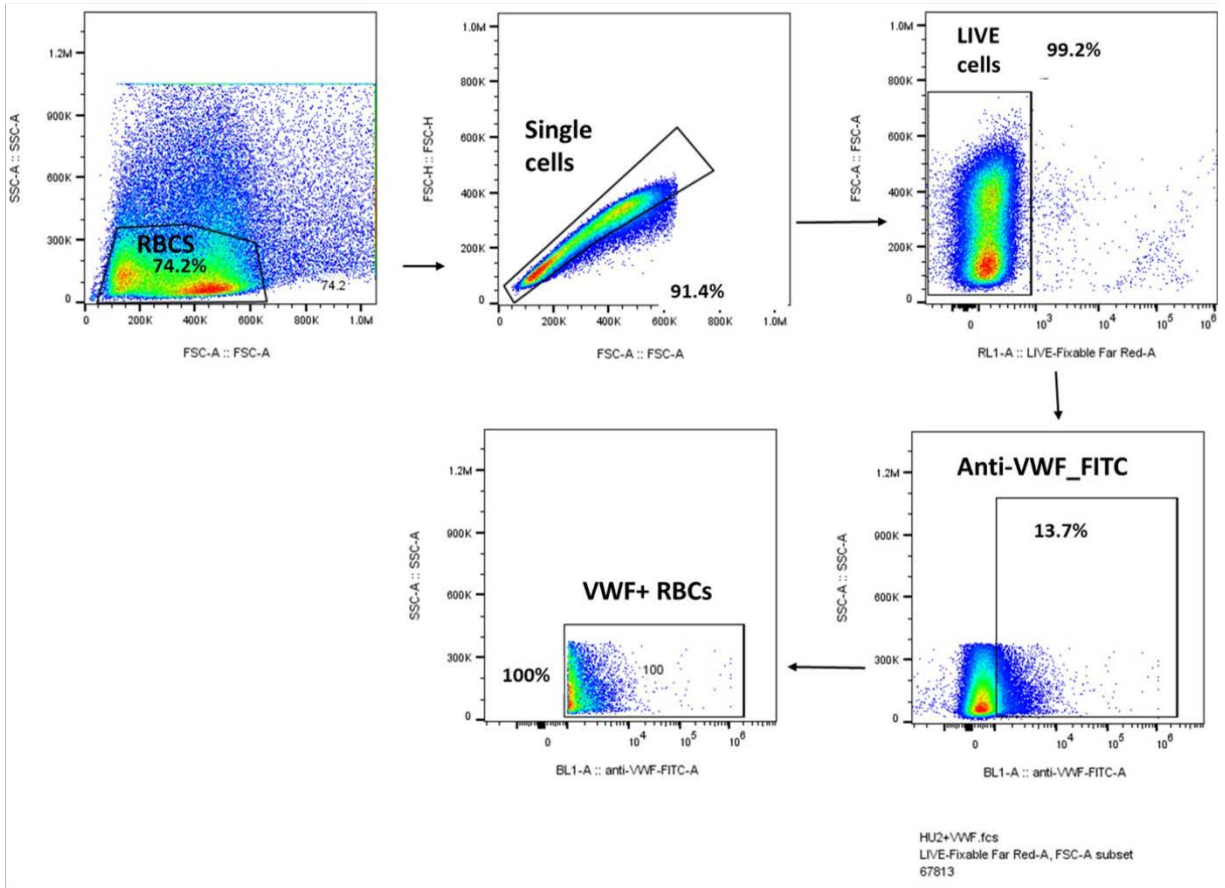

Supplementary Figure 3

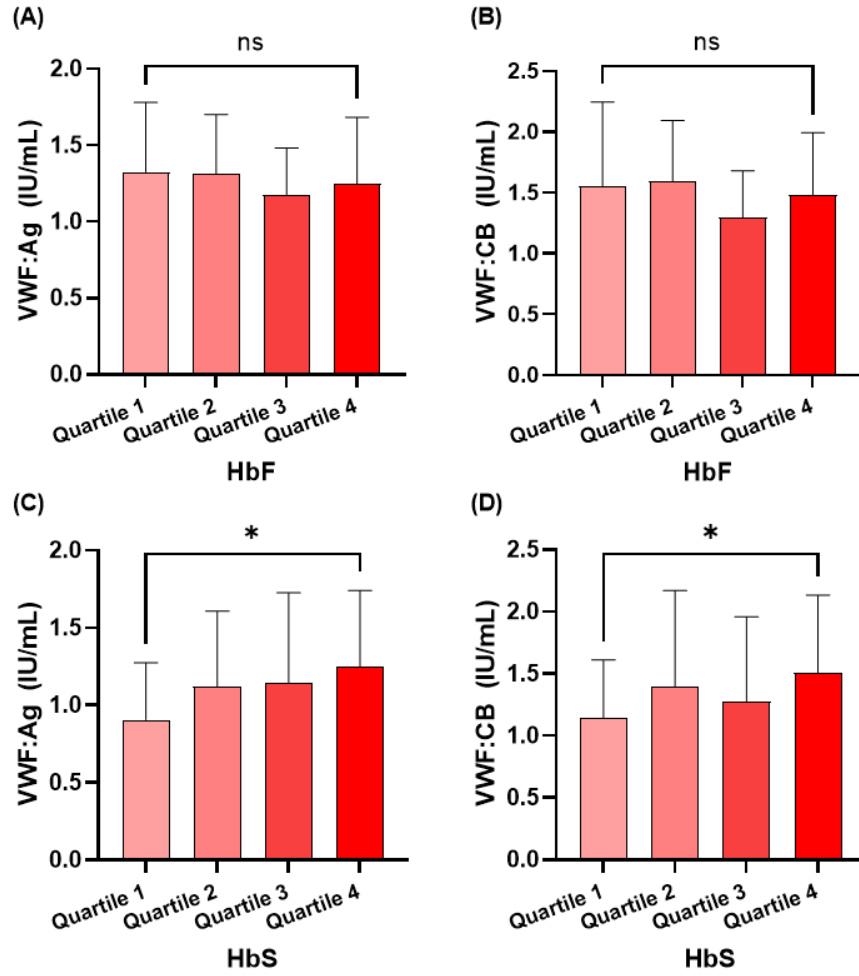

Supplementary Figure 4

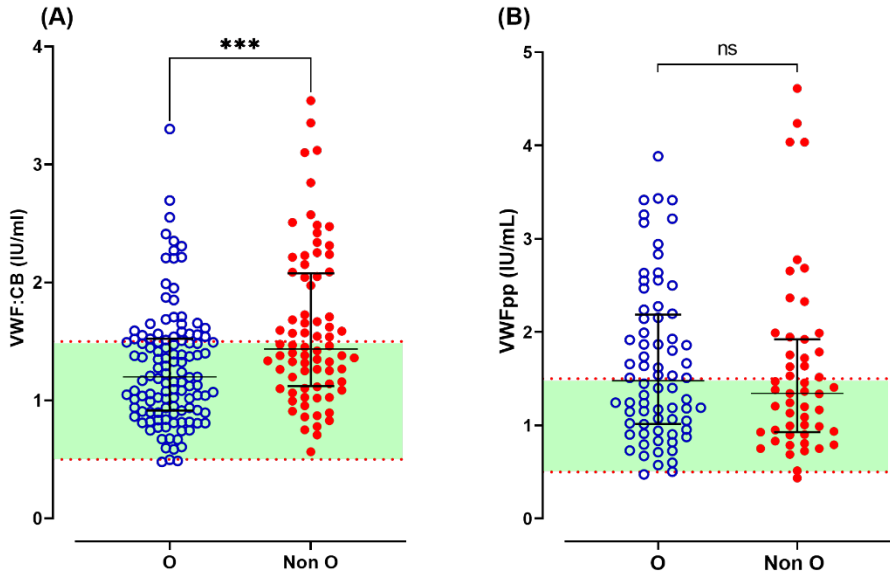

Supplementary Figure 5

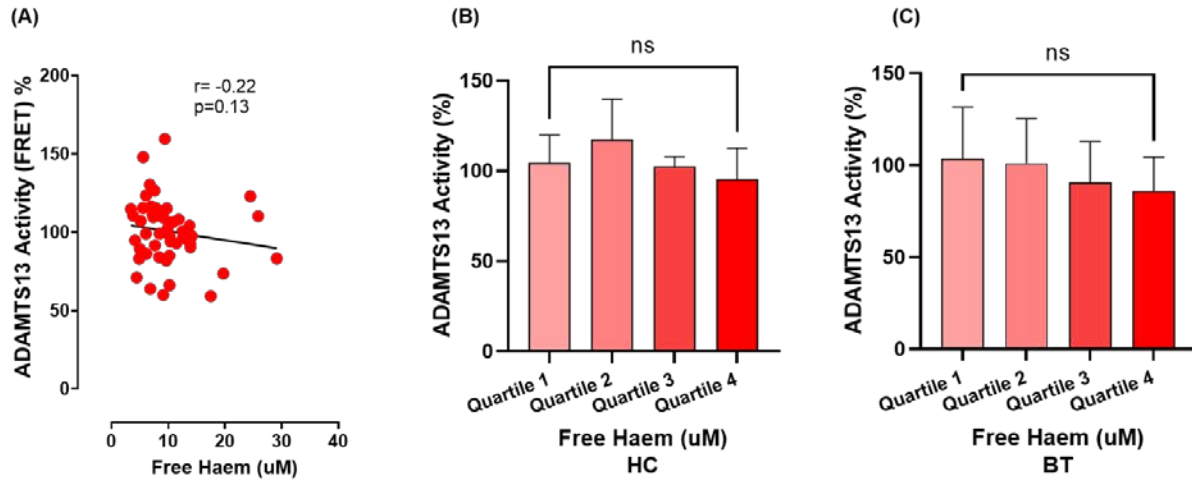

Supplement: BLOODA_ADV-2023-010824-mmc1.pdf [file BLOODA_ADV-2023-010824-mmc1.pdf]
